# Supplementary material for: Structure transformation by sp2 hydrocarbon assisted carbon nanotube growth
Source: Royal Society of Chemistry journal article supplement (doi:10.1039/c8ra04244f), 2018-01-01
Supplement: c8ra04244f1.pdf [file c8ra04244f1.pdf]

Supplementary Information

## Structure transformation by sp<sup>2</sup> hydrocarbon assisted carbon nanotube growth

*Sook Young Moon<sup>\*</sup>, Woo Sik Kim<sup>‡</sup>, and Chung Soo Kim<sup>‡</sup>*

<sup>†</sup>Institute of Advanced Composite Materials, Korea Institute of Science and Technology (KIST), Jeonbuk 55324, Republic of Korea

<sup>‡</sup>Ceramic Fiber & Composite Center, Korea Institute of Ceramic Engineering & Technology Gyeongsangnam-do 52851, Republic of Korea

<sup>‡</sup>Analysis & Certification Center, Korea Institute of Ceramic Engineering & Technology, Gyeongsangnam-do 52851, Republic of Korea

### AUTHOR INFORMATION

#### **Corresponding Author**

\* Sook Young Moon ([moon.sookyoung@kist.re.kr](mailto:moon.sookyoung@kist.re.kr))

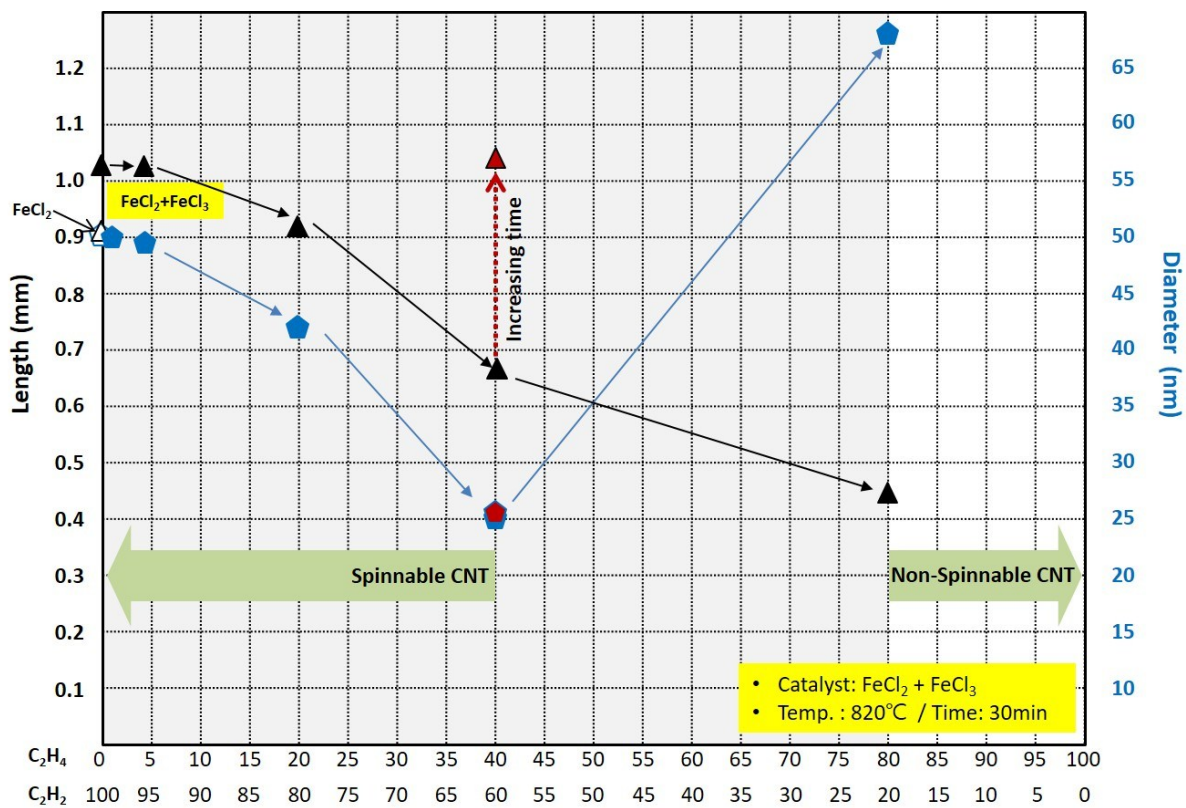

Figure 1S. The synthesized CNT arrays prepared with various R values.

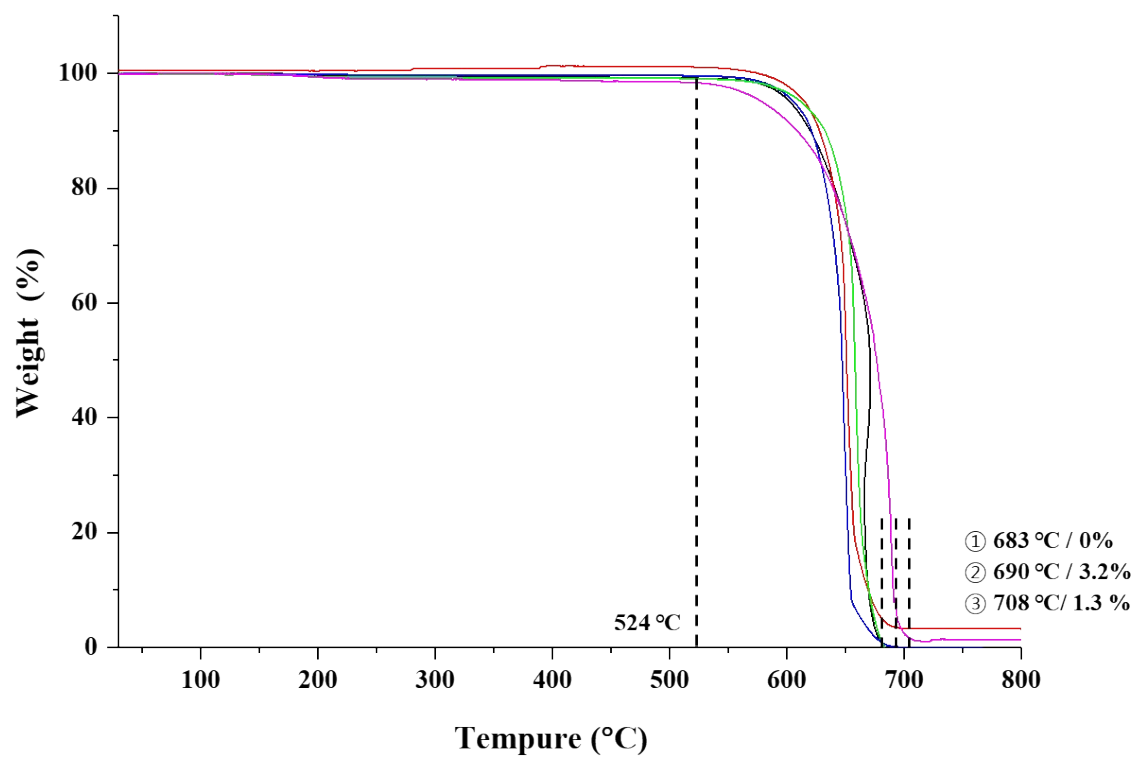

Figure 2S. TGA of CNTs prepared with various R values.

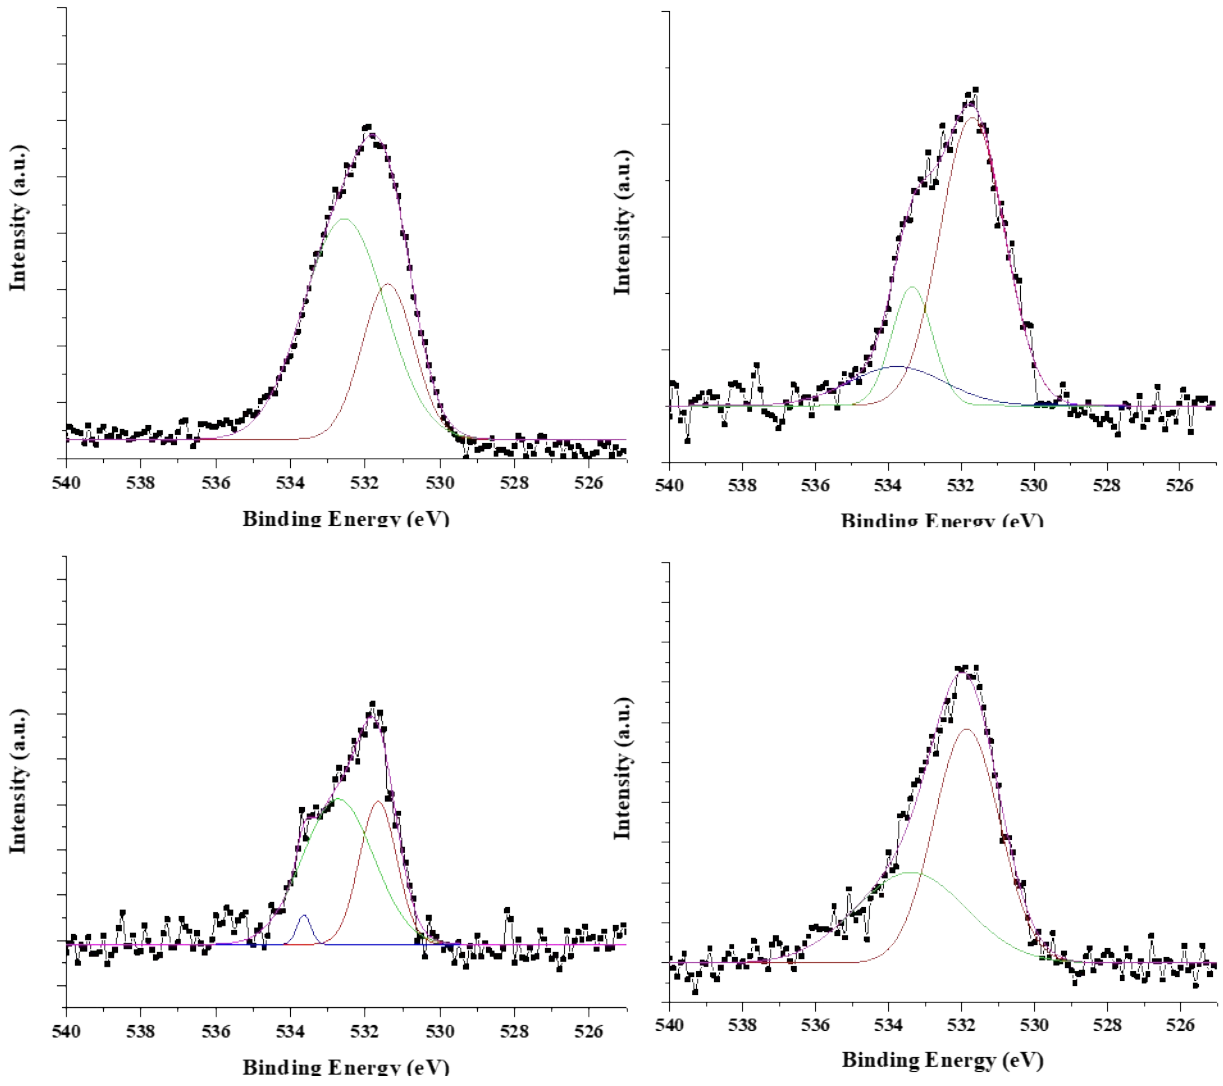

Figure 3S. O 1s XPS spectra of CNTs prepared with various R values.
